# Supplementary material
Source: PubMed Central journal article supplement (PMC356937)

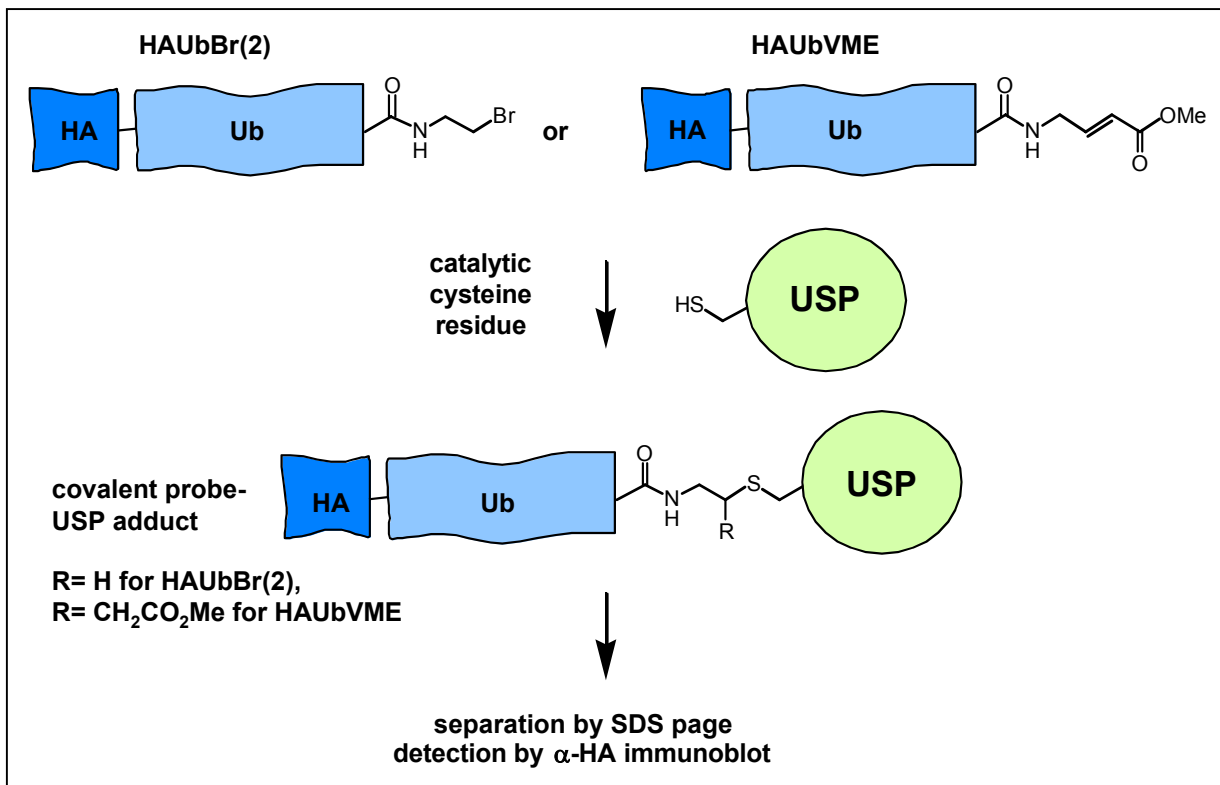

Supplement: pnas_0308411100_2.pdf [file pnas_0308411100_2.pdf]

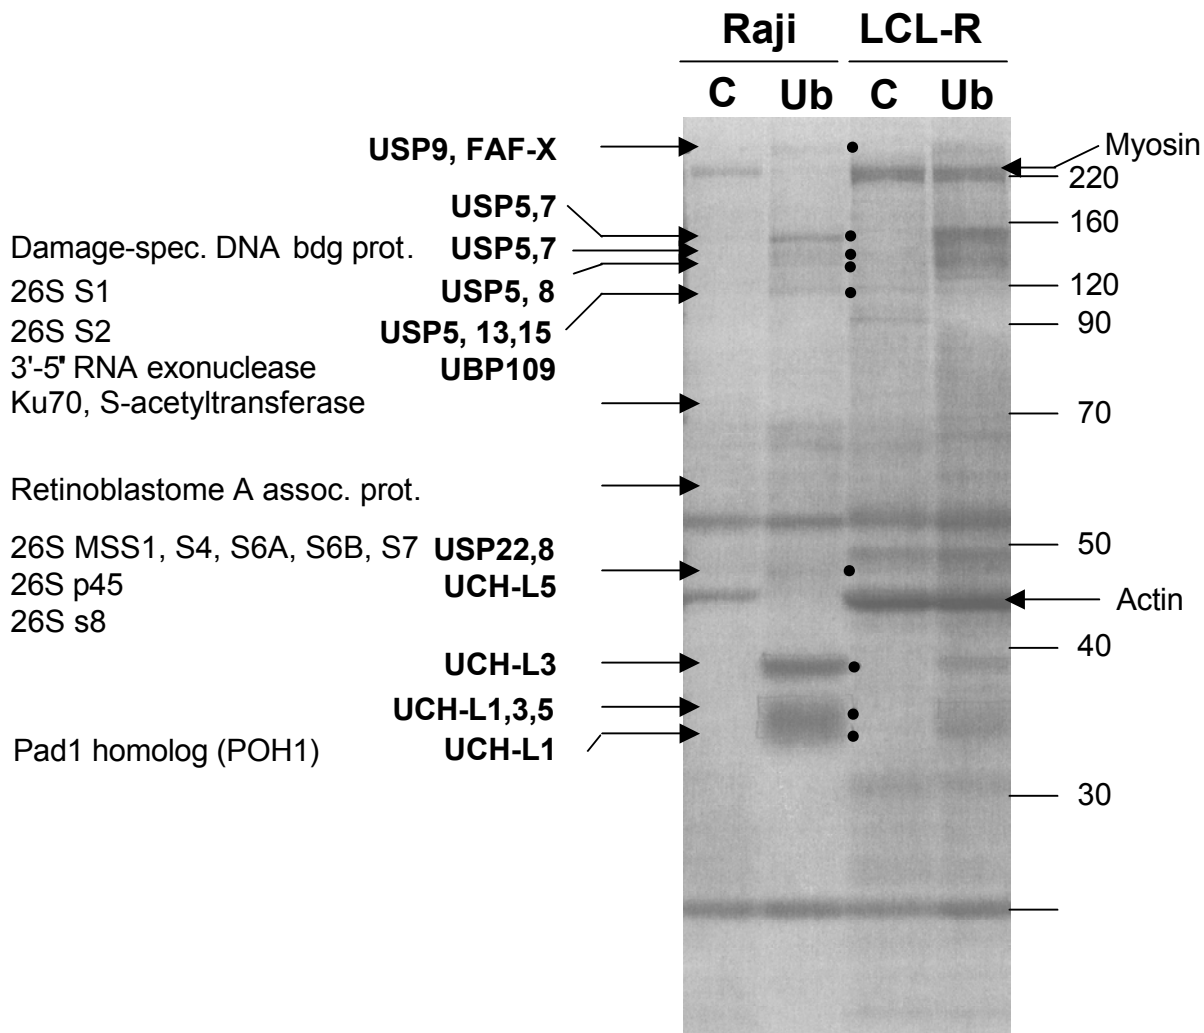

Supplement: pnas_0308411100_4.pdf [file pnas_0308411100_4.pdf]
